# Supplementary material for: Elevated urinary N-acetyl-β-D-glucosaminidase is associated with high glycoalbumin-to-hemoglobin A1c ratio in type 1 diabetes patients with early diabetic kidney disease
Source: PubMed Central journal article supplement (PMC5928247; doi:10.1038/s41598-018-25023-5), 2018-04-30
Supplement: 41598_2018_25023_MOESM1_ESM.pdf [file 41598_2018_25023_MOESM1_ESM.pdf]

**Title: Elevated urinary N-acetyl- $\beta$ -D-glucosaminidase is associated with high glycoalbumin-to-hemoglobin A1c ratio in type 1 diabetes patients with early diabetic kidney disease**

Namki Hong, MD, MPH<sup>1</sup>, Minyoung Lee, MD<sup>1</sup>, Soyoung Park, MD<sup>2</sup>, Yong-ho Lee, MD, PhD<sup>1</sup>, Sang-Man Jin, MD, PhD<sup>2</sup>, Jae Hyeon Kim, MD, PhD<sup>2</sup>, Byung-Wan Lee, MD, PhD<sup>1</sup>

<sup>1</sup>Division of Endocrinology and Metabolism, Department of Internal Medicine, Yonsei University College of Medicine, Seoul, Korea

<sup>2</sup>Division of Endocrinology and Metabolism, Department of Medicine, Samsung Medical Center, Sungkyunkwan University School of Medicine, Seoul, Korea

Co-Corresponding authors:

Jae Hyeon Kim, MD, PhD

Division of Endocrinology and Metabolism, Department of Medicine, Samsung Medical Center, Sungkyunkwan University School of Medicine, 81-Seoul, Irwon-ro, Gangnam-gu, Seoul 06351, Korea

Email: jaehyeon@skku.edu

Byung-Wan Lee, MD, PhD

Division of Endocrinology and Metabolism, Department of Internal Medicine, Yonsei University College of Medicine, 50-1 Yonsei-ro, Seodaemun-gu, Seoul 03722, Korea

Office number: +82-2-2228-1938

Fax number: +82-2-393-6884

Email: bwanlee@yuhs.ac

Supplementary Table 1. Association of uNAG excretion with G/A ratio in a subset of study subjects with normal to mildly increased albuminuria (A1, albumin-to-creatinine ratio less than 30 mg/g creatinine)

| Variables                                   | Univariate                       |              | Multivariate                     |              |
|---------------------------------------------|----------------------------------|--------------|----------------------------------|--------------|
|                                             | $\beta$ (95% CI)                 | P            | $\beta$ (95% CI)                 | P            |
| uNAG, log unit                              | <b>0.090 (0.007 to 0.172)</b>    | <b>0.032</b> | <b>0.127 (0.029 to 0.225)</b>    | <b>0.011</b> |
| Age, year                                   | 0.014 (-0.051 to 0.079)          | 0.668        | 0.001 (-0.005 to 0.006)          | 0.873        |
| Women<br>(vs. men)                          | 0.061 (-0.081 to 0.204)          | 0.400        | 0.017 (-0.135 to 0.171)          | 0.822        |
| BMI, kg/m <sup>2</sup>                      | <b>-0.027 (-0.049 to -0.004)</b> | <b>0.017</b> | <b>-0.029 (-0.052 to -0.007)</b> | <b>0.010</b> |
| Diabetes<br>duration, year                  | 0.061(-0.082 to 0.204)           | 0.404        | 0.136 (-0.017 to 0.289)          | 0.081        |
| uACR, log unit                              | -0.019 (-0.138 to 0.099)         | 0.745        | -0.102 (-0.241 to 0.036)         | 0.148        |
| Angiotensin<br>blockers use<br>(yes vs. no) | -0.148 (-0.368 to 0.071)         | 0.185        | -0.222 (-0.473 to 0.029)         | 0.083        |
| FPG, mg/dL                                  | <b>0.014 (0.003 to 0.024)</b>    | <b>0.011</b> | <b>0.014 (0.004 to 0.025)</b>    | <b>0.008</b> |
| Hemoglobin,<br>g/dL                         | -0.002 (-0.045 to 0.041)         | 0.911        | 0.012 (-0.032 to 0.055)          | 0.604        |

Abbreviations: uNAG, urinary N-acetyl- $\beta$ -D-glucosaminidase; BMI, body mass index; uACR, urinary albumin-to-creatinine ratio. In multivariate model,  $\beta$  coefficient of uNAG for G/A ratio was reported with adjustment for age, sex, BMI, duration of diabetes, log-uACR, angiotensin blockers use, FPG, and hemoglobin.

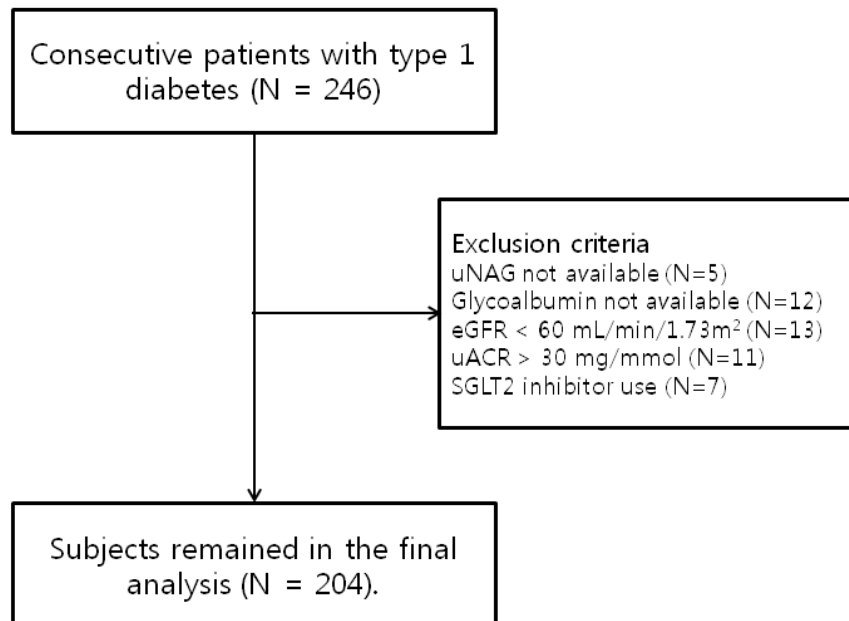

Supplementary Figure 1. Study flow diagram. Abbreviations: uNAG, urinary N-acetyl- $\beta$ -D-glucosaminidase; uACR, urinary albumin-to-creatinine ratio; eGFR, estimated glomerular filtration rate; SGLT2, sodium-glucose co-transporter 2.

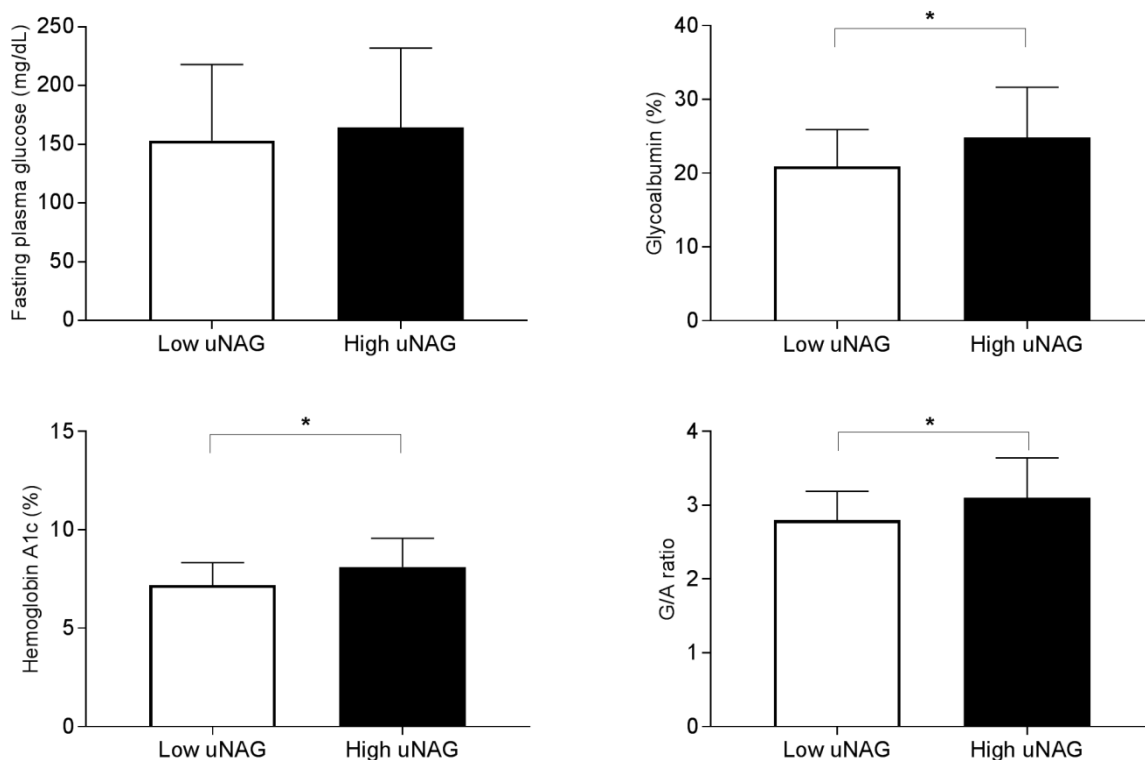

\* P value < 0.05

Supplementary Fig. 2. Comparison of glycemic parameters by uNAG level in a subset of subjects with normal to mildly increased albuminuria (A1, albumin-to-creatinine ratio (ACR) less than 30 mg/g creatinine). Low uNAG was defined as uNAG < 5.80 U/g creatinine, whereas high uNAG indicate uNAG  $\geq$  5.80 U/g creatinine. Abbreviations: uNAG, urinary N-acetyl- $\beta$ -D-glucosaminidase; G/A ratio, glycoalbumin-to-hemoglobin A1c ratio.
